# Supplementary material for: Past and Future of Plant Stress Detection: An Overview From Remote Sensing to Positron Emission Tomography
Source: Frontiers journal article supplement (doi:10.3389/fpls.2020.609155), 2021-01-27
Supplement: Table_1.DOCX [file Table_1.DOCX]

Table 1: Summary of some of the most commonly vegetation spectrum reflectance indices (SRIs) and the related estimated morphological or physiological traits. Traits can relate to more than one stressful condition, so the same index can detect different kinds of stress, both biotic and abiotic. Abbreviations: N, nitrogen; Chl, chlorophyll; Car, carotenoids.

| **Index** | **Formula** | **Estimated parameter** | **Reference** |
| --- | --- | --- | --- |
| Photochemical Reflectance Index (PRI) | (R531 - R570)/(R531+R570) | Physiology  Photosynthesis | Peñuelas et al. (1995a) |
| Normalized Difference Vegetation Index (NDVI) | (R800 - R670)/(R800 + R670) | Physiology Photosynthesis | Rouse et al. (1974) |
| Normalised Difference Red Edge (NDRE) | (R790 - R720)/(R790 + R720) | N status | Barnes et al. (2000) |
| Nitrogen Stress Index 1 (NSI-1) * | (R415/R710) | N content | Read et al. (2002) |
| Nitrogen Stress Index 2 (NSI-2) * | (R517/R413) | N content | Zhao et al. (2005) |
| Simple Ratio Index 1 (SR-1) * | (R750/R710) | Chl | Zarco-Tejada et al. (2001) |
| Simple Ratio Index 2 (SR-2) * | (R750/R550) | Chl | Gitelson and Merzlyak (1997) |
| Simple Ratio Index 3 (SR-3) * | (R750/R700) | Chl | Gitelson and Merzlyak (1997) |
| Green NDVI (GNDVI) | (R780 - R550)/(R780 + R550) | Chla | Gitelson et al. (1996) |
| Transformed Chlorophyll Absorption and Reflectance Index (TCARI) | 3 × ((R700 - R670) - 0.2 × (R700 - R550)) × (R700/R670) | Chl | Daughtry et al. (2000) |
| Structure Insensitive Pigment Index (SIPI) | (R800-R445)/(R800-R680) | Car/Chla | Peñuelas et al. (1995b) |
| Modified Chlorophyll Absorption in Reflectance Index (MCARI) | [(R700 - R670) - 0.2 * (R700 - R550)] * (R700/R670) | Green leaf area index  Chl | Daughtry et al. (2000) |
| Soil Adjusted Vegetation Index (SAVI) | 1.5 × (R800 - R670)/(R800 + R670 + 0.5) | Green biomass | Huete, 1988 |
| Plant Senescence Reflectance Index (PSRI) | (R678 - R500)/R750 | Car/Chl  Senescence | Merzlyak et al. (1999) |
| Anthocyanin Reflectance Index (ARI) | (1/R550) - (1/R700) | Pigments | Zarco-Tejada et al. (2005) |
| Salinity and Water Stress Indices 2 (SWSI 2) | (R803 - R681 / | Water content  Chlorophyll | Hamzeh et al. (2013) |
| Salinity and Water Stress Indices 3 (SWSI 3) | (R803 - R681 / | Water content  Chlorophyll | Hamzeh et al. (2013) |
| Water Index (WI) | R900/R970 | Leaf water potential | Zarco-Tejada et al. (2003) |
| Simple Ratio Water Index (SRWI) | R860/R1240 | Leaf water potential | Zarco-Tejada et al. (2003) |
| Normalized Difference Water  Index (NDWI) | (R860 - R1240)/ (R860+ R1240) | Leaf water potential | Gao (1996) |
| Leaf Water Index (LWI)* | (R1300/R1450) | Leaf water thickness | Seeling et al. (2008) |
| Normalized Water Indices (NWI-1) | R970 - R900/R970 + R900 | Canopy water status | Babar et al. (2006) |
| Normalized Water Indices (NWI-2) | R970 - R850/R970 + R850 | Canopy water status | Babar et al. (2006) |
| Normalized Water Indices (NWI-3) | R970 – R920/R970 + R920 | Canopy water status | Prasad et al. (2007) |
| Normalized Water Indices (NWI-4) | R970 – R880/R970 + R880 | Canopy water status | Prasad et al. (2007) |
| Normalized Photochemical Reflectance Index (PRInorm) | PRI / [RDVI×(R700/R670)] | Chlorophyll fluorescence  Stomatal conductance | Berni et al. (2009a)  Berni et al. (2009b) |
| Copper Stress Vegetation Index (CSVI) | R550/R850 ×R700/R850 | Copper content | Zhang et al. (2017) |
| New Vegetation Heavy Metal Pollution Index (VHMPI) | DCR505 - DCR640/ DCR690 -DCR730 | Copper content | Zhang et al. (2019) |
| Heavy Metal Cd Stress-Sensitive Spectral Index (HCSI) | (R780-R712)/R678 × (R678/R550) | Cadmium content | Wu et al. (2019) |
| Heavy Metal Stress Sensitive Index (HMSSI) | CI(Red-edge)/PSRI | Cadmium, lead and mercury contents | Zhang et al. (2018) |
| * No original index abbreviation found | | | |
