# Supplementary material for: Past and Future of Plant Stress Detection: An Overview From Remote Sensing to Positron Emission Tomography
Source: Frontiers journal article supplement (doi:10.3389/fpls.2020.609155), 2021-01-27
Supplement: Table_2.DOCX [file Table_2.DOCX]

**Table 2**: Published claims of stress identification from hyperspectral imaging since 2018, along with the chosen multivariate data processing technique and accuracy reached. “Plant stress” refers to both (i) the classification or modelling of stressful conditions and (ii) the plant phenotyping.

| **Plant stress** | **Species** | **Techniques** | **Accuracy** | **Reference** |
| --- | --- | --- | --- | --- |
| Chilling | blueberry | PLS-DA | >75% | Gao et al. (2019) |
| Salinity | wheat | Novel approach | -- | Moghimi et al. (2018) |
| Drought | grapevine | PLS-DA  PLS-SVM | >97% | Zovko et al. (2019) |
| Drought | grapevine | RF (Deep learning) | 80-83% | Loggenberg et al. (2018) |
| Drought | rice | PLSR-MLR | >90% | Krishna et al. (2019) |
| Drought | tomato | Derived SRIs | -- | Elvanidi et al. (2018) |
| Drought  *Meloidogyne incognita* (Nematoda) | tomato | PLS-DA  PLS-SVM | 90-100% | Susič et al. (2018) |
| Insect herbivory | maize | SLDA  Discriminant classification model | 79.0% | do Prado Ribeiro et al. (2018) |
| Powdery Mildew | grapevine | PLS-DA |  | Pérez-Roncal et al. (2020) |
| Stripe rust | wheat | PCA  BPNN | ~92% | Yao et al. (2019) |
| *Fusarium* head blight | wheat | Derived SRIs | -- | Mahlein et al. (2019) |
| *Septoria tritici* | wheat | PLS-DA | 93% | Yu et al. (2018) |
| Powdery mildew | barley | SiVM  Non-linear SVM | ~95% | Thomas et al. (2018) |
| *Magnaporthe oryzae* | barley | LDA  CARS | >98% | Zhou et al. (2019) |
| Charcoal rot | soybean | SVM | 97% | Nagasubramanian et al. (2018) |
| *Sclerotinia* stem rot | oilseed rape | PLS-DA  SVM | >90% | Kong et al. (2018) |
| *Alternaria solani* | potato | PLS-DA  SVM | 92% | Van De Vijver et al. (2020) |
| Citrus canker | tangerine | RBS  KNN | 94-100% | Abdulridha et al. (2019) |
| tomato spotted wilt | sweet pepper | OR-AC-GAN (Deep learning) | 96% | Wang et al. (2019) |
| N content | tea | PLS-DA  LS-SVM  PLSR | >90% | Wang et al. (2020) |
| N content | apple | PLSR  MLR | 77-78% | Ye et al. (2019) |
| shikimic acid concentration | transgenic maize | PLSR | 82% | Feng et al. (2018) |
| Cadmium content (model) | tomato | WT-LSSVR (Deep learning) | -- | Jun et al. (2018) |
| Lead concentration (model) | lettuce | WT-SAE (Deep learning) | -- | Zhou et al. (2020) |
| Dicamba | soybean | RF (Deep learning) | -- | Zhang et al. (2019) |
| BPNN, back propagation neural network; CARS, competitive adaptive reweighted sampling; FNN fully-connected neural network; KNN, K nearest neighbor; LDA, linear discriminant analysis; LS-SVM, least squares-support vector machines; MLR, multiple linear regression; OR-AC-GAN outlier removal auxiliary classifier generative adversarial nets; PCA, principal component analysis; PLS-DA partial least squares-discriminant analysis; PLS-SVM, partial least squares-support vector machine; PLSR, partial least-squares regression model; RBF, radial basis function; RF random forest; SiVM, simplex volume maximization; SLDA, stepwise linear discriminant analysis; SRIs, spectrum reflectance indices; SVM, support vector machine; WT-LSSVR wavelet transform and least-square support vector machine regression; WT-SAE wave-let transform and stacked auto-encoders. | | | | |

***References Table X***

Ashourloo, D., Mobasheri, M., & Huete, A. (2014). Developing two spectral disease indices for detection of wheat leaf rust (Pucciniatriticina). Remote Sensing, 6(6), 4723-4740.

Blackburn, G. A. (1998). Quantifying chlorophylls and caroteniods at leaf and canopy scales: An evaluation of some hyperspectral approaches. Remote sensing of environment, 66(3), 273-285.

Carter, G. A. (1994). Ratios of leaf reflectances in narrow wavebands as indicators of plant stress. Remote sensing, 15(3), 697-703.

Chen, T., Zhang, J., Chen, Y., Wan, S., & Zhang, L. (2019). Detection of peanut leaf spots disease using canopy hyperspectral reflectance. Computers and electronics in agriculture, 156, 677-683.

Daughtry, C. S. T., Walthall, C. L., Kim, M. S., De Colstoun, E. B., & McMurtrey Iii, J. E. (2000). Estimating corn leaf chlorophyll concentration from leaf and canopy reflectance. Remote sensing of Environment, 74(2), 229-239.

Gamon, J. A., Penuelas, J., & Field, C. B. (1992). A narrow-waveband spectral index that tracks diurnal changes in photosynthetic efficiency. Remote Sensing of environment, 41(1), 35-44.

Gao, B. C. (1996). NDWI-A normalized difference water index for remote sensing of vegetation liquid water from space. Remote sensing of environment, 58(3), 257-266.

Gitelson, A. A., Kaufman, Y. J., & Merzlyak, M. N. (1996). Use of a green channel in remote sensing of global vegetation from EOS-MODIS. Remote sensing of Environment, 58(3), 289-298.

Gitelson, A. A., & Merzlyak, M. N. (1997). Signature analysis of leaf reflectance spectra: algorithm development for remote sensing of chlorophyll. International Journal of Remote Sensing, 18, 2691-2697.

Gitelson, A. A., Gritz, Y., & Merzlyak, M. N. (2003). Relationships between leaf chlorophyll content and spectral reflectance and algorithms for non-destructive chlorophyll assessment in higher plant leaves. Journal of plant physiology, 160(3), 271-282.

Haboudane, D., Miller, J. R., Tremblay, N., Zarco-Tejada, P. J., & Dextraze, L. (2002). Integrated narrow-band vegetation indices for prediction of crop chlorophyll content for application to precision agriculture. Remote sensing of environment, 81(2-3), 416-426.

Lichtenthaler, H. K., Lang, M., Sowinska, M., Heisel, F., & Miehe, J. A. (1996). Detection of vegetation stress via a new high-resolution fluorescence imaging system. Journal of plant physiology, 148(5), 599-612.

Mahlein, A. K., Rumpf, T., Welke, P., Dehne, H. W., Plümer, L., Steiner, U., & Oerke, E. C. (2013). Development of spectral indices for detecting and identifying plant diseases. Remote Sensing of Environment, 128, 21-30.

Main, R., Cho, M. A., Mathieu, R., O’Kennedy, M. M., Ramoelo, A., & Koch, S. (2011). An investigation into robust spectral indices for leaf chlorophyll estimation. ISPRS Journal of Photogrammetry and Remote Sensing, 66(6), 751-761.

Merzlyak, M. N., Gitelson, A. A., Chivkunova, O. B., & Rakitin, V. Y. (1999). Non‐destructive optical detection of pigment changes during leaf senescence and fruit ripening. Physiologia plantarum, 106(1), 135-141.

Peñuelas, J., Filella, I., & Gamon, J. A. (1995a). Assessment of photosynthetic radiation‐use efficiency with spectral reflectance. New Phytologist, 131(3), 291-296.

Peñuelas, J., Baret, F., & Filella, I. (1995b). Semi-empirical indices to assess carotenoids/chlorophyll a ratio from leaf spectral reflectance. Photosynthetica, 31(2), 221-230.

Peñuelas, J., Filella, I., Lloret, P., Mun Oz, F., & Vilajeliu, M. (1995c). Reflectance assessment of mite effects on apple trees. International Journal of Remote Sensing, 16(14), 2727-2733.

Peñuelas, J., Gamon, J. A., Fredeen, A. L., Merino, J., & Field, C. B. (1994). Reflectance indices associated with physiological changes in nitrogen-and water-limited sunflower leaves. Remote sensing of Environment, 48(2), 135-146.

Peñuelas, J., & Inoue, Y. (1999). Reflectance indices indicative of changes in water and pigment contents of peanut and wheat leaves. Photosynthetica, 36(3), 355-360.

Read, J. J., Tarpley, L., McKinion, J. M., & Reddy, K. R. (2002). Narrow-waveband reflectance ratios for remote estimation of nitrogen status in cotton. Journal of environmental quality, 31(5), 1442-1452.

Rouse Jr, J., Haas, R. H., Schell, J. A., & Deering, D. W. (1974). Monitoring vegetation systems in the Great Plains with ERTS.

Seelig, H. D., Hoehn, A., Stodieck, L. S., Klaus, D. M., Adams Iii, W. W., & Emery, W. J. (2008). Relations of remote sensing leaf water indices to leaf water thickness in cowpea, bean, and sugar beet plants. Remote Sensing of Environment, 112(2), 445-455.

Smith, R. C. G., Adams, J., Stephens, D. J., & Hick, P. T. (1995). Forecasting wheat yield in a Mediterranean-type environment from the NOAA satellite. Australian Journal of Agricultural Research, 46(1), 113-125.

Yu, K., Anderegg, J., Mikaberidze, A., Petteri, K., Mascher, F., McDonald, B. A., ... & Hund, A. (2018). Hyperspectral canopy sensing of wheat *Septoria tritici* blotch disease. Frontiers in plant science, 9, 1195.

Zarco-Tejada, P. J., Miller, J. R., Noland, T. L., Mohammed, G. H., & Sampson, P. H. (2001). Scaling-up and model inversion methods with narrowband optical indices for chlorophyll content estimation in closed forest canopies with hyperspectral data. IEEE Transactions on Geoscience and Remote Sensing, 39(7), 1491-1507.

Zarco-Tejada, P. J., Pushnik, J. C., Dobrowski, S., & Ustin, S. L. (2003). Steady-state chlorophyll a fluorescence detection from canopy derivative reflectance and double-peak red-edge effects. Remote Sensing of Environment, 84(2), 283-294.

Zarco-Tejada, P. J., Berjón, A., López-Lozano, R., Miller, J. R., Martín, P., Cachorro, V., ... & De Frutos, A. (2005). Assessing vineyard condition with hyperspectral indices: Leaf and canopy reflectance simulation in a row-structured discontinuous canopy. Remote Sensing of Environment, 99(3), 271-287.

Zhao, D., Reddy, K. R., Kakani, V. G., Read, J. J., & Koti, S. (2005). Selection of optimum reflectance ratios for estimating leaf nitrogen and chlorophyll concentrations of field-grown cotton. Agronomy Journal, 97(1), 89-98.
